# Supplementary material for: A lab-made screen-printed sensing strip for sensitive and selective electrochemical detection of butylated hydroxyanisole
Source: Royal Society of Chemistry journal article supplement (doi:10.1039/d3lc00060e), 2023-01-01
Supplement: d3lc00060e1.pdf [file d3lc00060e1.pdf]

## Supplementary Information

### **A lab-made screen-printed sensing strip for sensitive and selective electrochemical detection of butylated hydroxyanisole**

Salih Zeki Bas<sup>a1</sup>, Rumeysa Cetiner<sup>a</sup>, Deniz Teke<sup>a</sup>, Mustafa Ozmen<sup>a</sup>

---

<sup>a</sup>Department of Chemistry, Science Faculty, Selcuk University, 42130, Konya, Turkey.

\*Corresponding author: [salihzekibas@gmail.com](mailto:salihzekibas@gmail.com)

†Electronic supplementary information (ESI) available: cross-sectional SEM images of LabSPE before and after modification, FT-IR spectrum of g-C<sub>3</sub>N<sub>4</sub>-Fe<sub>3</sub>O<sub>4</sub> nanocomposite, XRD pattern of g-C<sub>3</sub>N<sub>4</sub> and g-C<sub>3</sub>N<sub>4</sub>-Fe<sub>3</sub>O<sub>4</sub>, WCA measurements of electrodes, CVs of LabSPE and commercial SPE, selectivity test of sensor, DPVs of mixture of BHA and other antioxidants, and stability test of sensor.

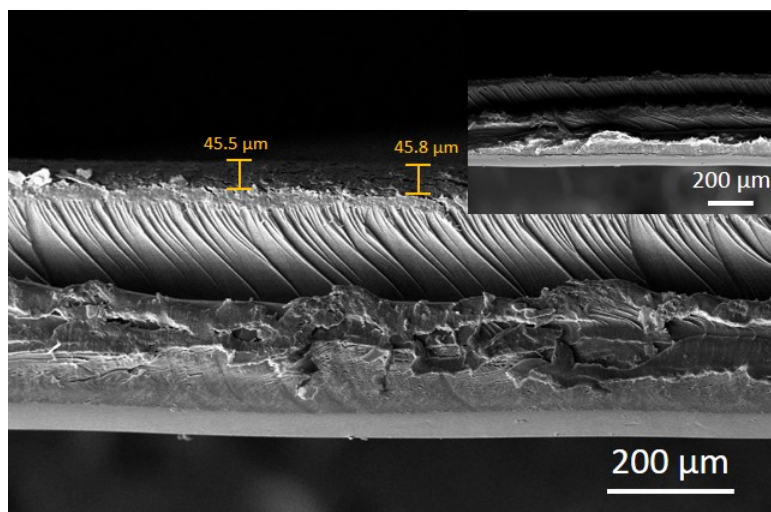

**Fig. S1.** Cross-sectional SEM images of LabSPE before and after modification.

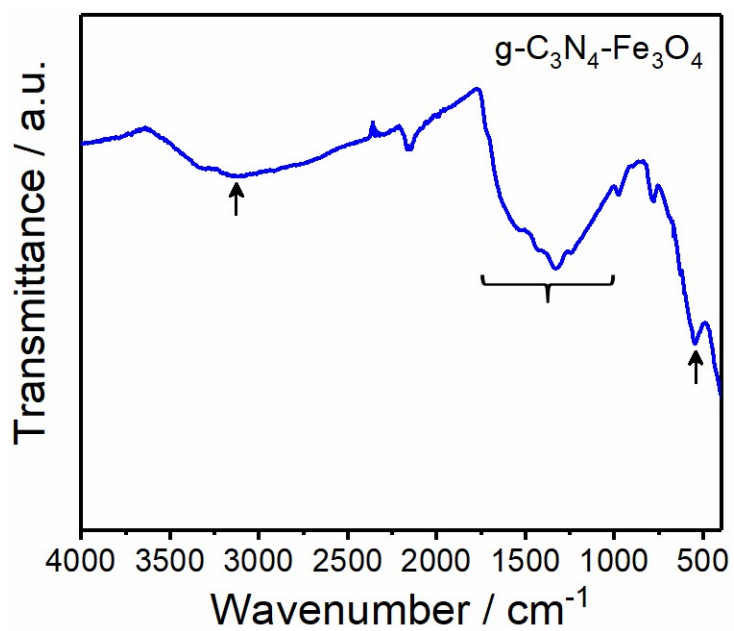

**Fig. S2.** FT-IR spectrum of g-C<sub>3</sub>N<sub>4</sub>-Fe<sub>3</sub>O<sub>4</sub> nanocomposite.

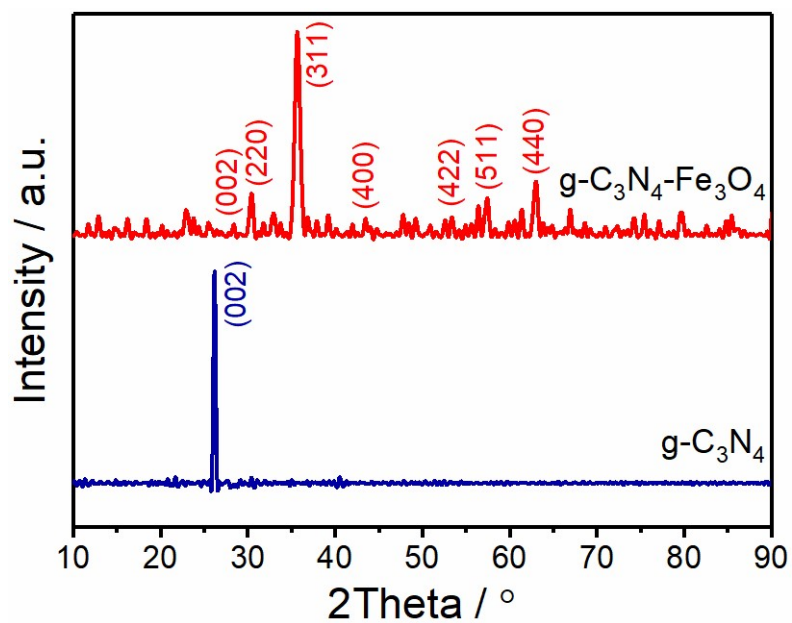

**Fig. S3.** XRD pattern of  $g\text{-C}_3\text{N}_4$  and  $g\text{-C}_3\text{N}_4\text{-Fe}_3\text{O}_4$  nanocomposite.

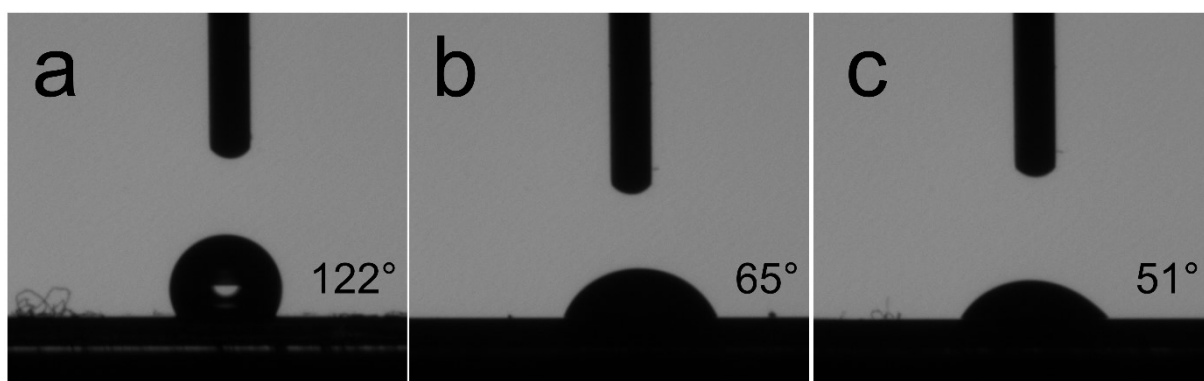

**Fig. S4.** WCA measurements of bare LabSPE (a),  $g\text{-C}_3\text{N}_4\text{-Fe}_3\text{O}_4/\text{LabSPE}$  (b), and  $\text{Pt}/g\text{-C}_3\text{N}_4\text{-Fe}_3\text{O}_4/\text{LabSPE}$  (c) surfaces.

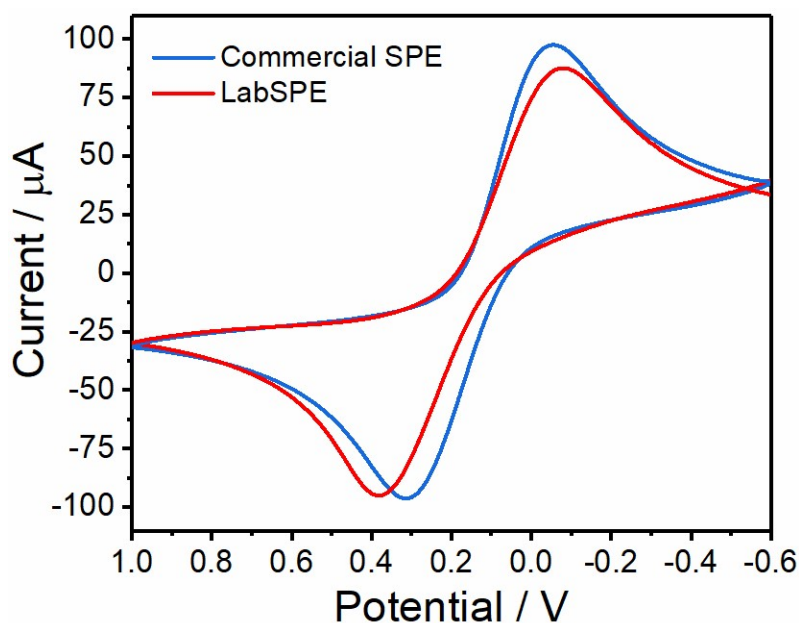

**Fig. S5.** CVs of LabSPE and commercial SPE in 0.1 M KCl solution containing 5 mM  $\text{Fe}(\text{CN})_6^{3-/4-}$ .

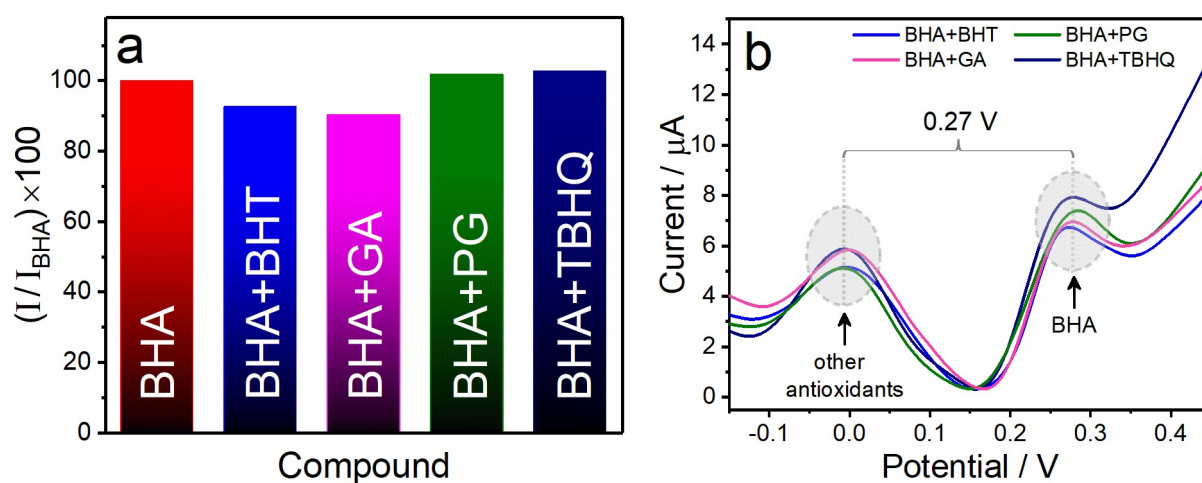

**Fig. S6.** (a) Selectivity test of Pt/g- $\text{C}_3\text{N}_4$ - $\text{Fe}_3\text{O}_4$ /LabSPE in the presence of 25  $\mu\text{M}$  BHA, 25  $\mu\text{M}$  BHA + 25  $\mu\text{M}$  BHT, 25  $\mu\text{M}$  BHA + 25  $\mu\text{M}$  GA, 25  $\mu\text{M}$  BHA + 25  $\mu\text{M}$  PG, 25  $\mu\text{M}$  BHA + 25  $\mu\text{M}$  TBHQ in pH 4.0 citric acid- $\text{Na}_2\text{HPO}_4$  buffer solution. (b) DPVs of Pt/g- $\text{C}_3\text{N}_4$ - $\text{Fe}_3\text{O}_4$ /LabSPE in the presence of 25  $\mu\text{M}$  BHA + 25  $\mu\text{M}$  other antioxidant compound (BHT, GA, PG or TBHQ) in pH 4.0 citric acid- $\text{Na}_2\text{HPO}_4$  buffer solution.

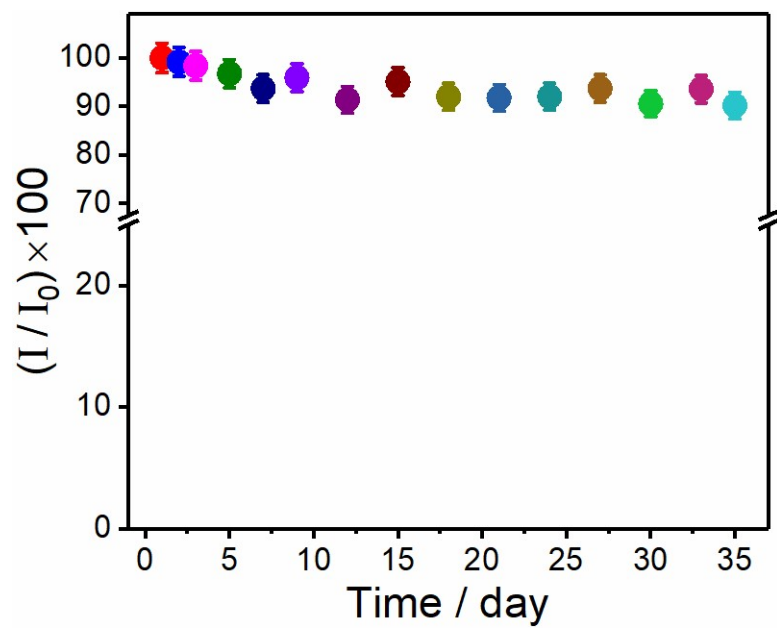

**Fig. S7.** Stability test of Pt/g-C<sub>3</sub>N<sub>4</sub>-Fe<sub>3</sub>O<sub>4</sub>/LabSPE in the presence of 10 μM BHA for 35 days.
